# Supplementary material for: Optimizing tissue-clearing conditions based on analysis of the critical factors affecting tissue-clearing procedures
Source: PubMed Central journal article supplement (PMC6109102; doi:10.1038/s41598-018-31153-7), 2018-08-24
Supplement: 41598_2018_31153_MOESM1_ESM.pdf [file 41598_2018_31153_MOESM1_ESM.pdf]

## Supplementary Information

### **Optimizing tissue-clearing conditions based on analysis of the critical factors affecting tissue-clearing procedures**

June Hoan Kim<sup>1</sup>, Min Jee Jang<sup>1</sup>, Jungyoon Choi<sup>1</sup>, Eunsoo Lee<sup>1</sup>, Kyung-Deok Song<sup>2,3</sup>, Jaeho Cho<sup>4</sup>, Keun-Tae Kim<sup>5</sup>, Hyuk-Jin Cha<sup>6</sup>, Woong Sun<sup>1\*</sup>

<sup>1</sup>Department of Anatomy, Korea University College of Medicine, Seoul 02841, Republic of Korea. <sup>2</sup>Department of Physics, Korea University, Seoul 02841, Republic of Korea. <sup>3</sup>Center for Molecular Spectroscopy and Dynamics, Institute for Basic Science (IBS), Seoul 02841, Republic of Korea. <sup>4</sup>Department of Radiation Oncology, Yonsei University College of Medicine, 50 Yonsei-ro, Seodaemun-gu, Seoul 120-752, Republic of Korea. <sup>5</sup>Department of Life Science, Sogang University, 35th Baekbum-ro Mapo-gu, Seoul 04107, Republic of Korea. <sup>6</sup>College of Pharmacy, Department of Pharmacy, Seoul National University, Gwanak-ro, Gwanak-gu, Seoul 08826, Republic of Korea.

\*To whom correspondence should be addressed. Email: [woongsun@korea.ac.kr](mailto:woongsun@korea.ac.kr)

Supplementary information

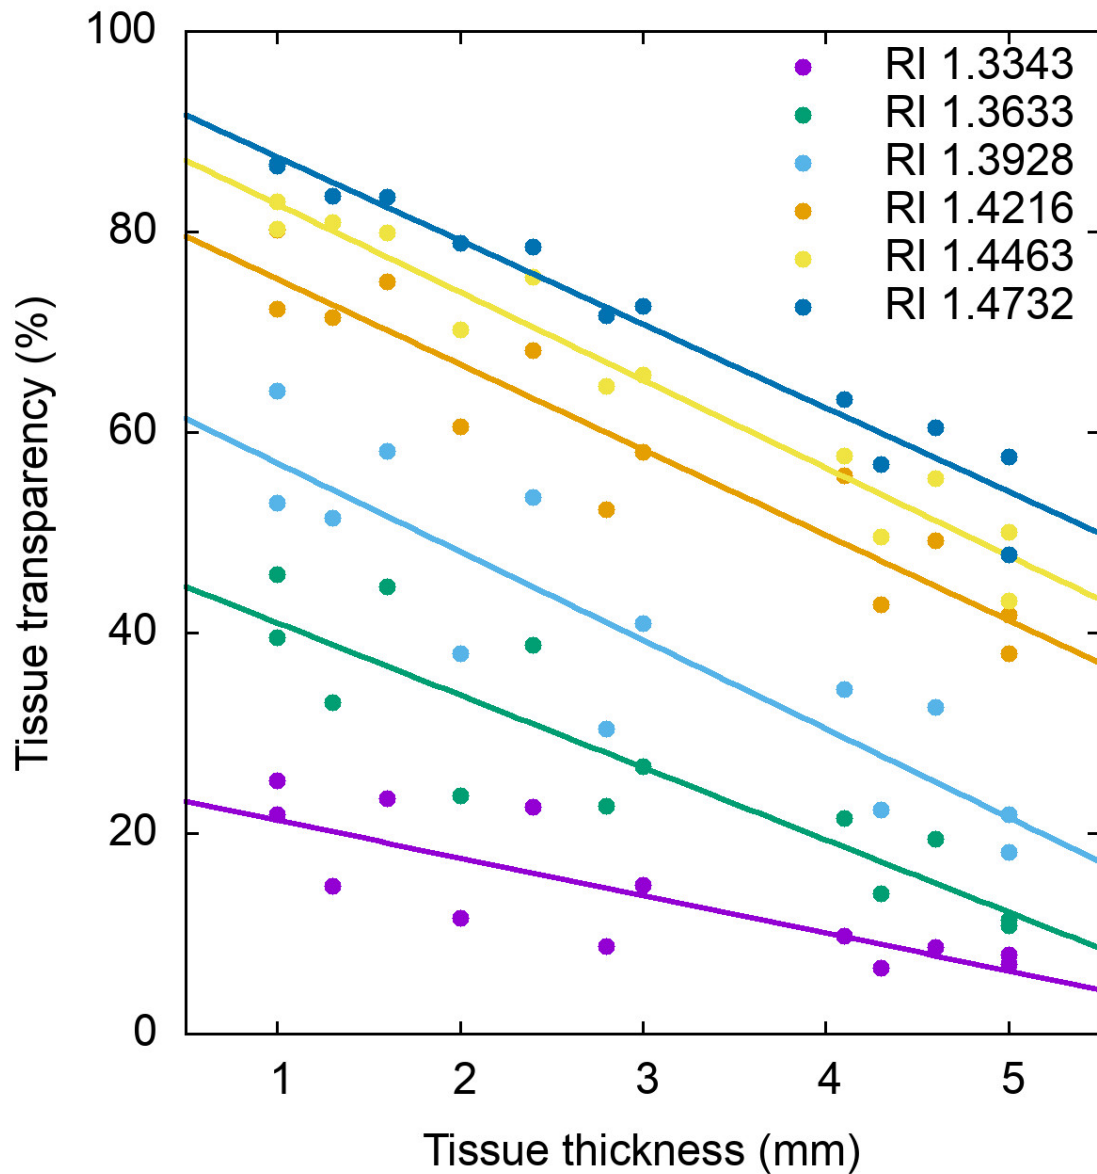

**Supplementary Figure 1 Thickness and transparency of tissue.** Whole liver tissues were cleared by ACT and was trimmed 1-5 mm-thick and RI-adjusted with different RI-matching solution; Cubic-mount was diluted by PBS to 0, 20, 40, 60, 80, 100 %, and transparency of the tissues measured. (N=13)

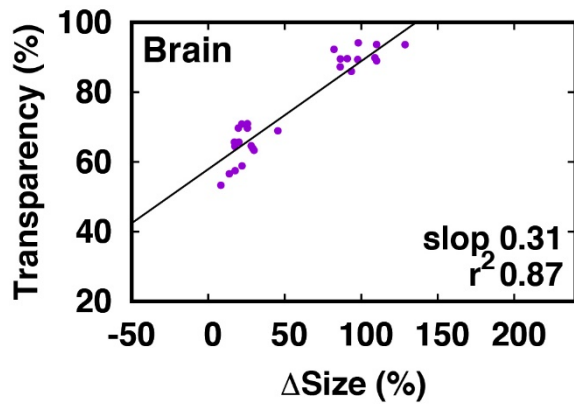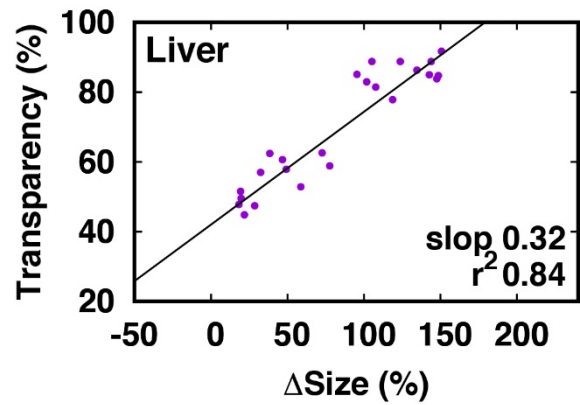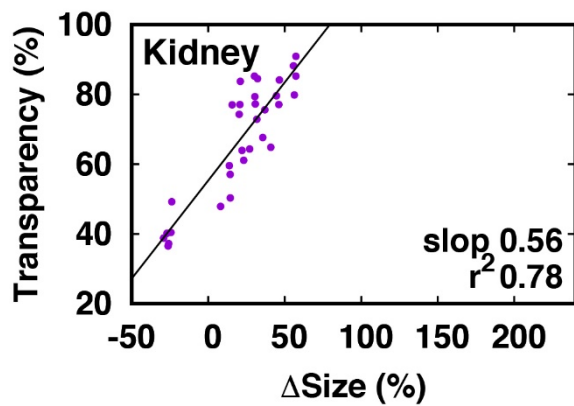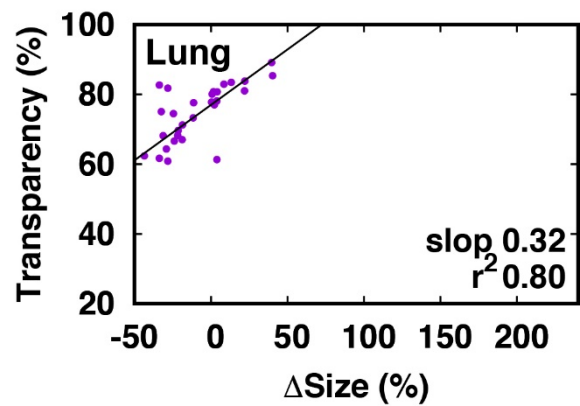

**Supplementary Figure 2 Transparency change by size variation.** Size change and transparency of tissues in 1-10x PBS and 4% SDS diluted in DI water were plotted and fitted by linear function for brain, liver, kidney, and lung tissues. (N=26, 24, 32, 30 for brain, liver, kidney and lung respectively)

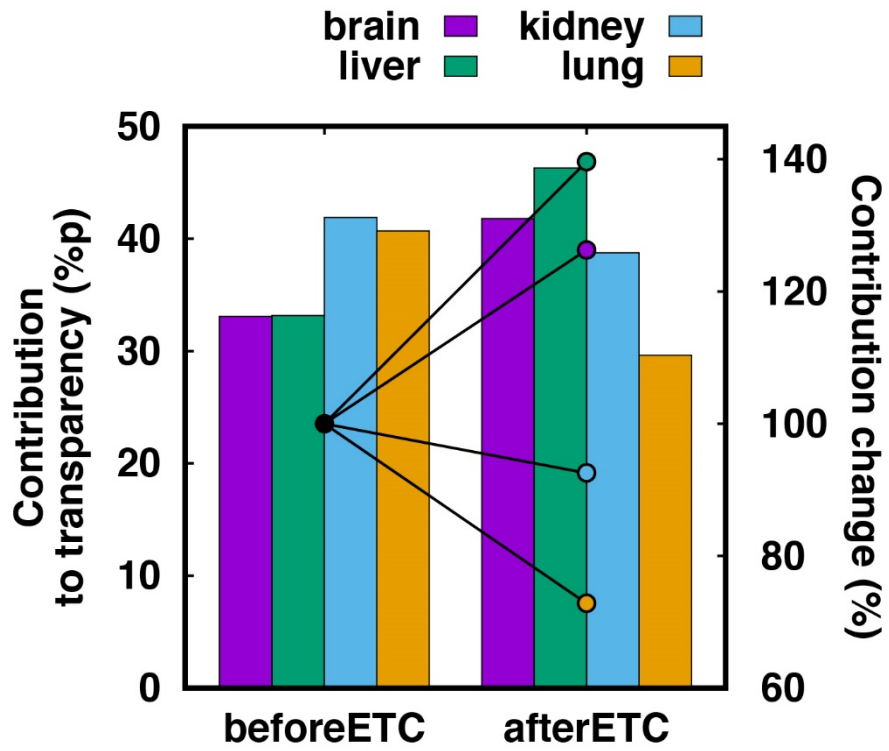

**Supplementary Figure 3 The RI-matching of lipid and RI solution.** Contributions of lipid to RI-matching before/after clearing (bars) and contribution changes by lipid extraction (lines). (N=3 for each organ).

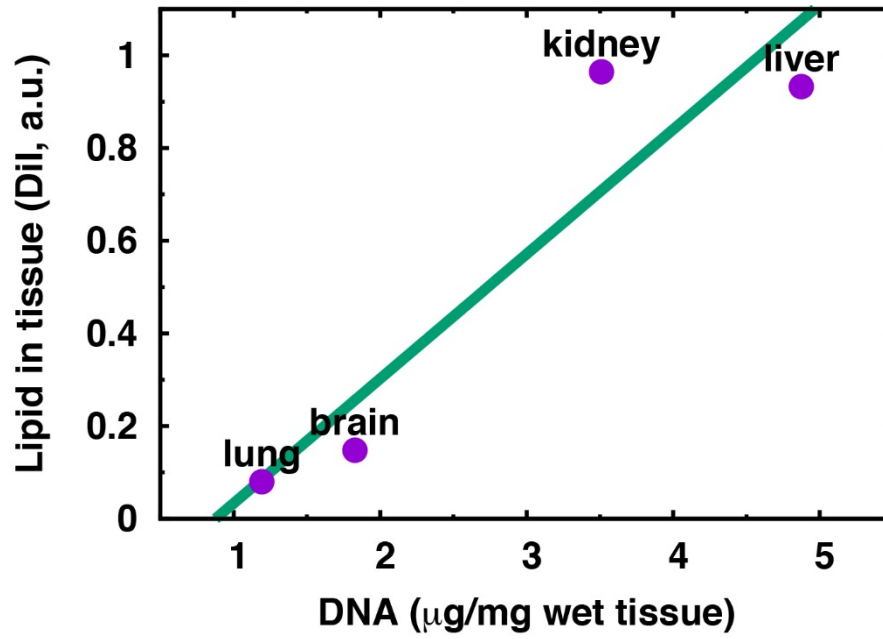

**Supplementary Figure 4 DNA and lipid concentrations in tissues.** Amount of lipid and DNA were average of 3 samples each for each organ. Samples for measuring lipid and DNA were different from each other.

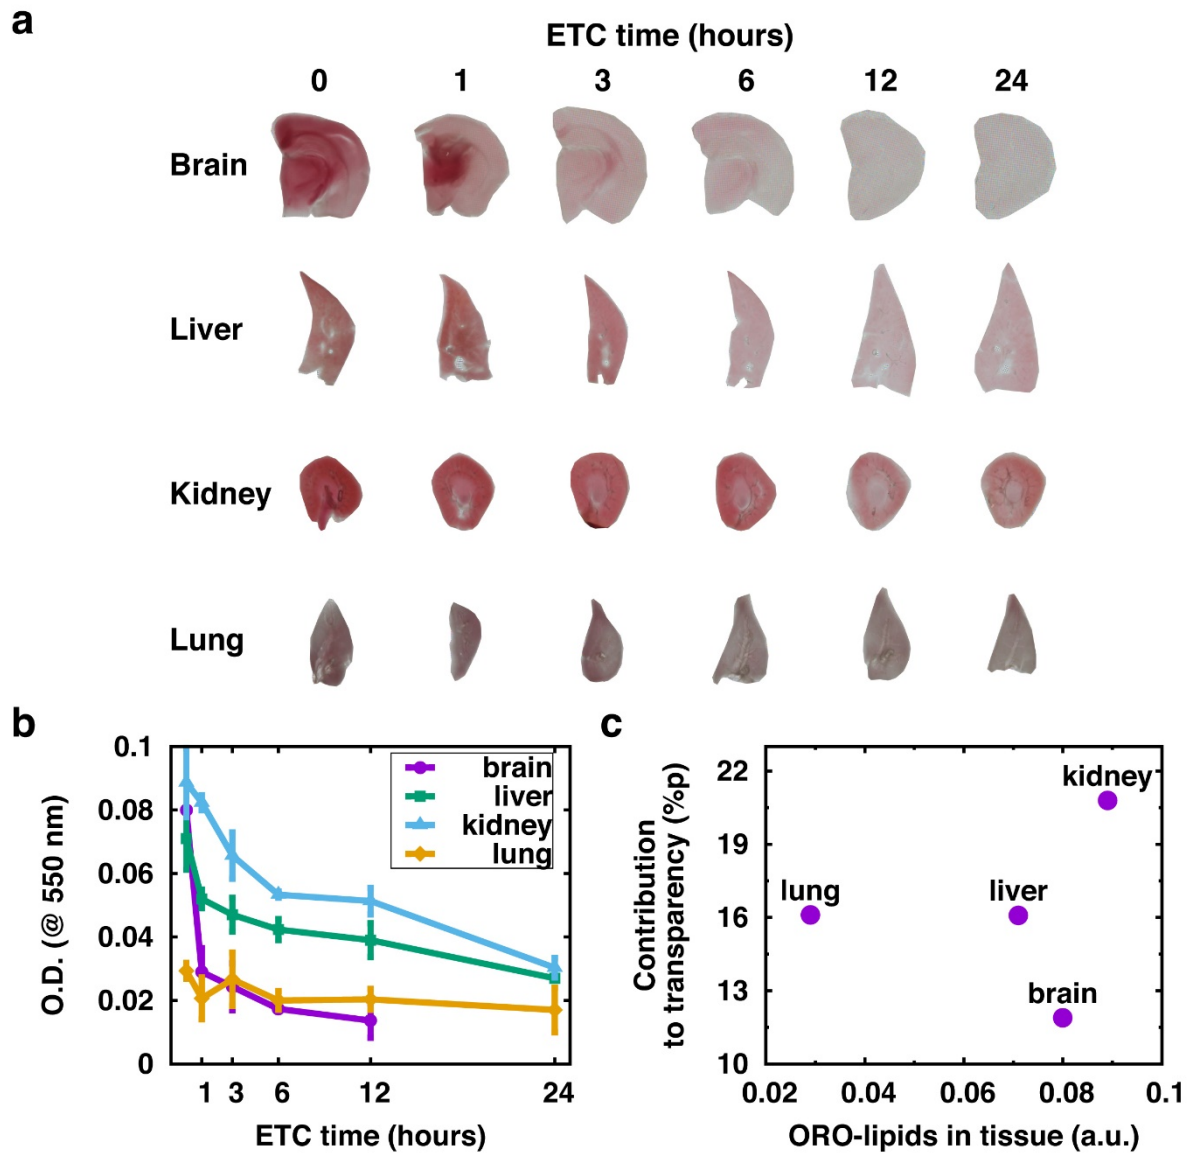

**Supplementary Figure 5 Oil-red-O labeled lipid extraction.** (A) Images of Oil-red-O loaded tissue, 1 mm-thick organ slices at different electrophoretic tissue clearing (ETC) time points. (B) Lipid extraction rate. (C) Correlation graph of extracted lipid and contribution of lipid extraction to improvement of transparency of each organ. (N=3 for each ETC time for each organ)

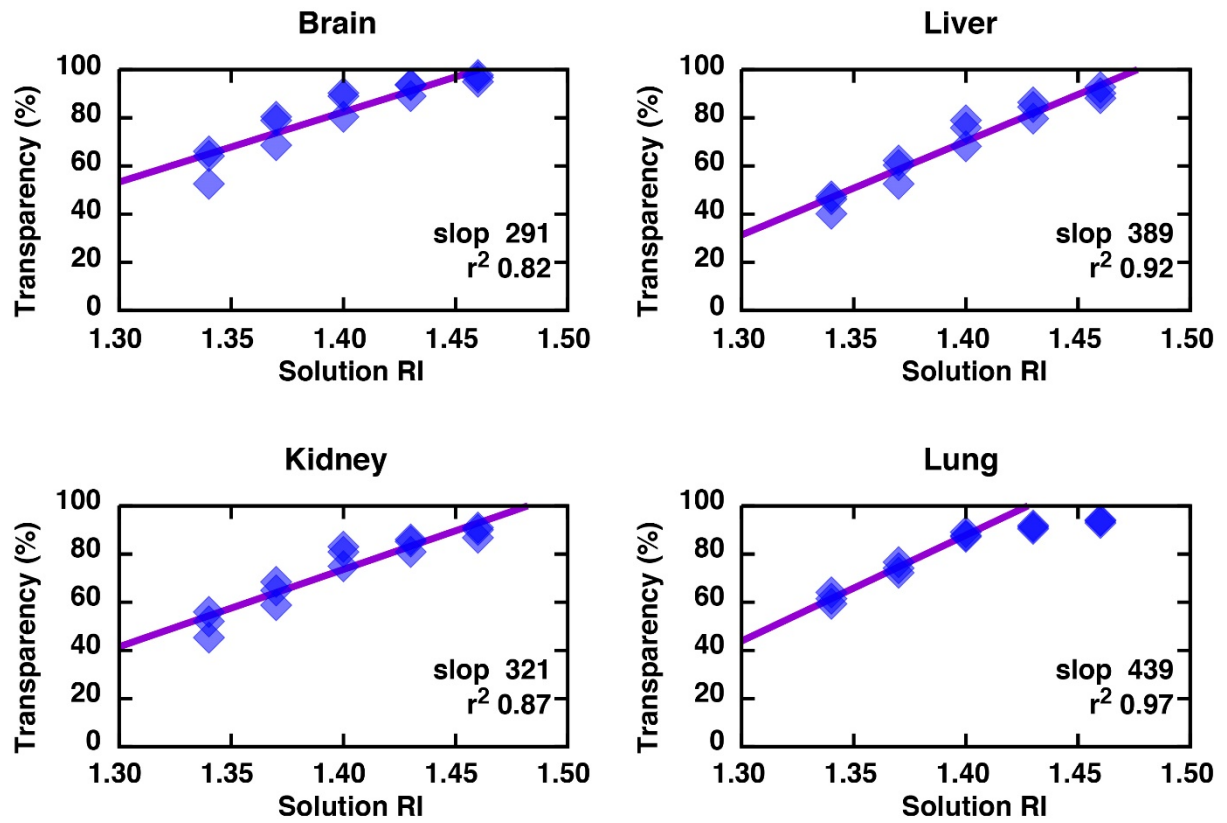

**Supplementary Figure 6** The transparency variation by solution RI changes. Correlation of tissue transparency and RI value of solution. The data points were fitted by linear function. 4 points of lung which seemed to be saturated in transparency were excluded from linear regression. (N=3 for each organ).

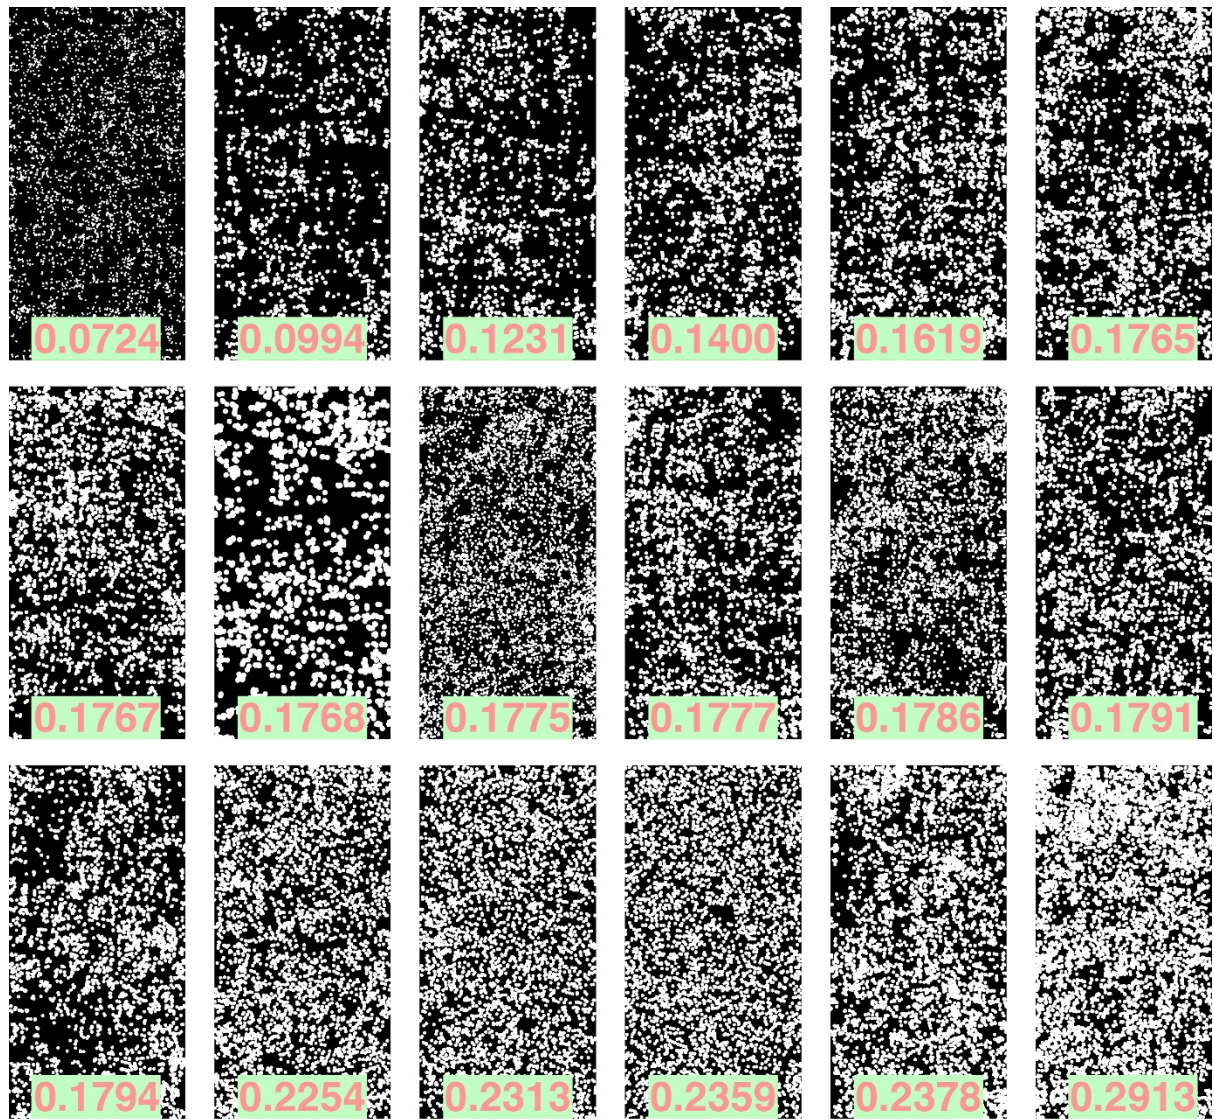

**Supplementary Figure 7 Sample images with ECM density for FDTD simulation.** Background (black) mimics background solution (water, RI: 1.33) and white dot represents ECM (RI: 1.47).



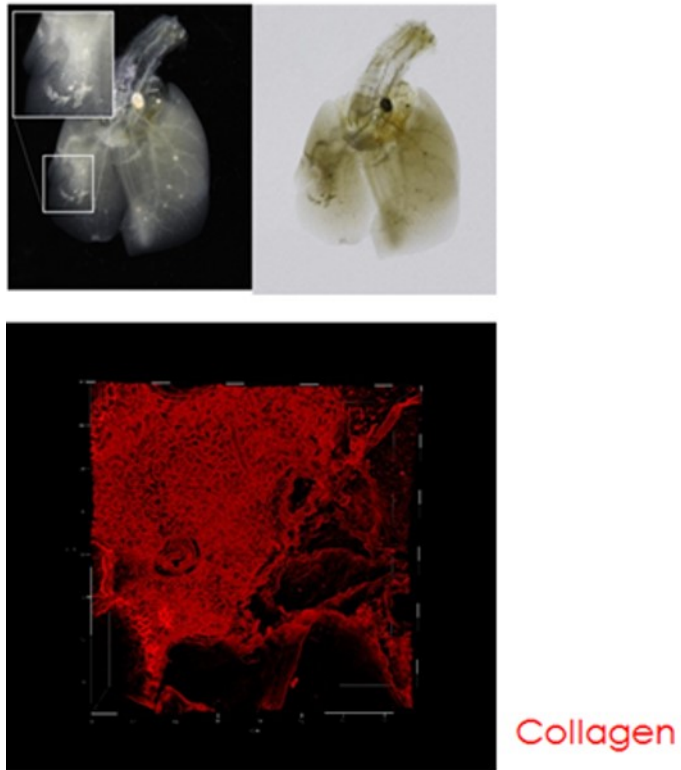

**Supplementary Figure 8 The focal lung fibrosis model.** The optical contrast of fibrosis that could be detected by collagen IV staining was enhanced by tissue clearing.

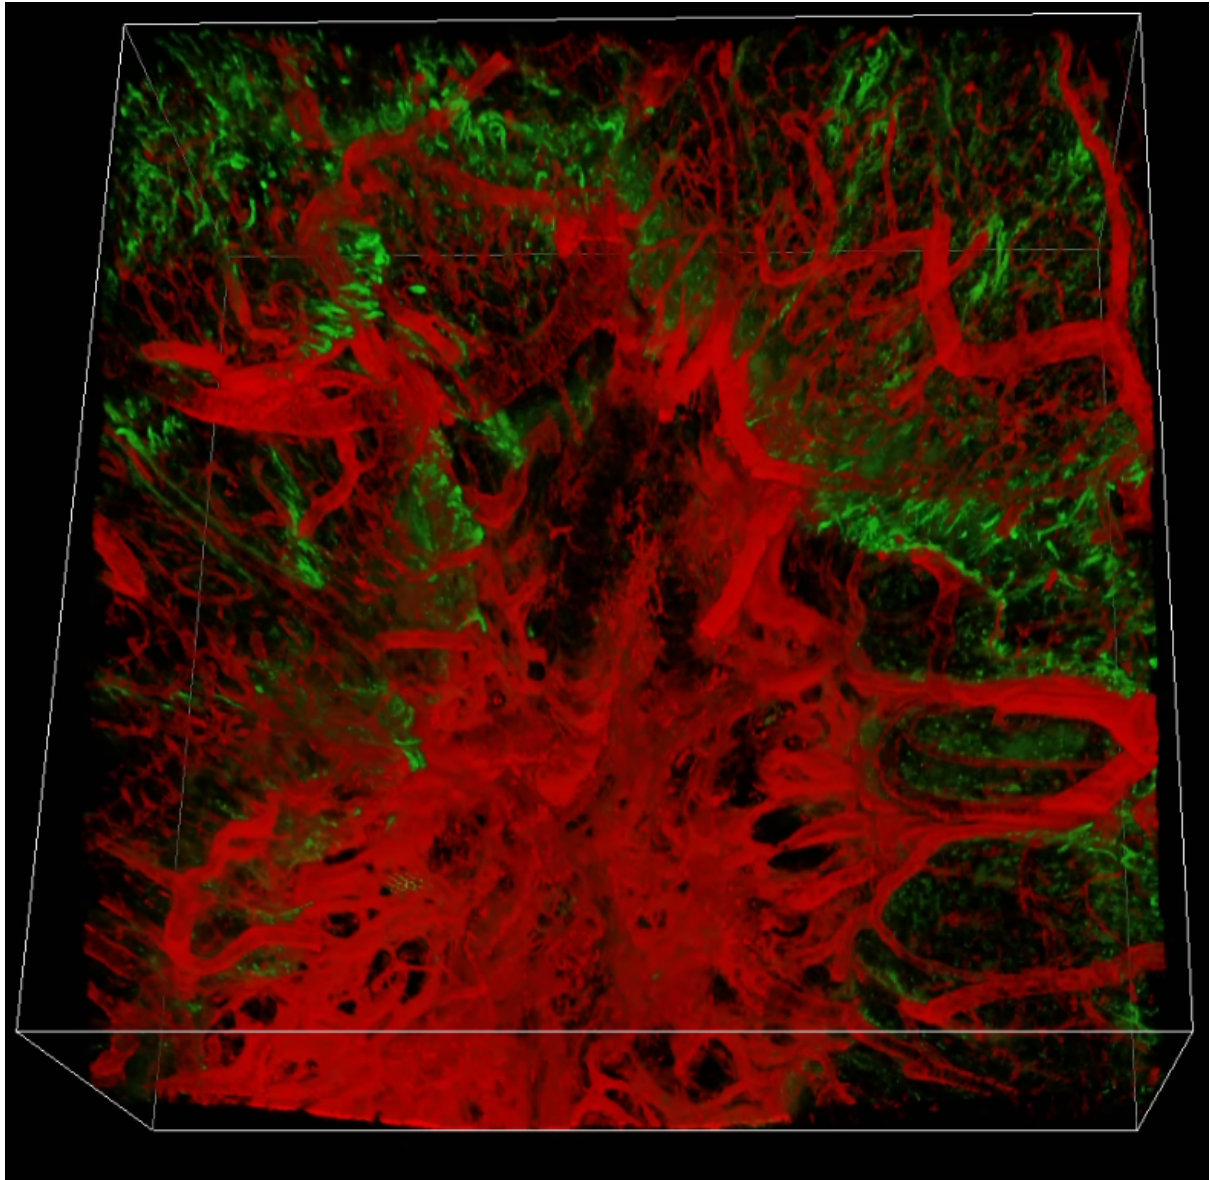

**Supplementary Video 1 Accumulation of ECM and glial cells in and around TBI**

A brain tissue in TBI days 7 was cut into 1.5 mm \* 1.5 mm \* 0.76 mm after 6hr ETC, and Collagen IV and GFAP were immunostained with red and green fluorescence respectively.

**Supplementary Table 1. One-way ANOVA with post-hoc Tukey**

\* P < 0.05, \*\* P < 0.01, \*\*\* P < 0.001

| Transparency |                                  |            |        |         |                  |
|--------------|----------------------------------|------------|--------|---------|------------------|
|              | Tukey's Multiple Comparison Test | Mean Diff. | q      | Summary | 95% CI of diff   |
| Brain        | PBS(Fix-poly) vs CM(Fix-poly)    | -33.08     | 21.56  | ***     | -40.22 to -25.94 |
|              | PBS(Fix-poly) vs SDS(ETC)        | -48.18     | 31.4   | ***     | -55.32 to -41.04 |
|              | PBS(Fix-poly) vs PBS(ETC)        | -11.89     | 7.748  | **      | -19.03 to -4.748 |
|              | PBS(Fix-poly) vs CM(ETC)         | -53.68     | 34.98  | ***     | -60.82 to -46.54 |
|              | CM(Fix-poly) vs SDS(ETC)         | -15.1      | 9.84   | ***     | -22.24 to -7.958 |
|              | CM(Fix-poly) vs PBS(ETC)         | 21.19      | 13.81  | ***     | 14.05 to 28.33   |
|              | CM(Fix-poly) vs CM(ETC)          | -20.6      | 13.42  | ***     | -27.74 to -13.46 |
|              | SDS(ETC) vs PBS(ETC)             | 36.29      | 23.65  | ***     | 29.15 to 43.43   |
|              | SDS(ETC) vs CM(ETC)              | -5.5       | 3.584  | ns      | -12.64 to 1.642  |
|              | PBS(ETC) vs CM(ETC)              | -41.79     | 27.23  | ***     | -48.93 to -34.65 |
| liver        | PBS(Fix-poly) vs CM(Fix-poly)    | -33.15     | 11.7   | ***     | -46.34 to -19.96 |
|              | PBS(Fix-poly) vs SDS(ETC)        | -41.75     | 14.73  | ***     | -54.94 to -28.56 |
|              | PBS(Fix-poly) vs PBS(ETC)        | -16.09     | 5.677  | *       | -29.28 to -2.898 |
|              | PBS(Fix-poly) vs CM(ETC)         | -62.37     | 22     | ***     | -75.56 to -49.18 |
|              | CM(Fix-poly) vs SDS(ETC)         | -8.6       | 3.034  | ns      | -21.79 to 4.592  |
|              | CM(Fix-poly) vs PBS(ETC)         | 17.06      | 6.019  | *       | 3.868 to 30.25   |
|              | CM(Fix-poly) vs CM(ETC)          | -29.22     | 10.31  | ***     | -42.41 to -16.03 |
|              | SDS(ETC) vs PBS(ETC)             | 25.66      | 9.053  | ***     | 12.47 to 38.85   |
|              | SDS(ETC) vs CM(ETC)              | -20.62     | 7.275  | **      | -33.81 to -7.428 |
|              | PBS(ETC) vs CM(ETC)              | -46.28     | 16.33  | ***     | -59.47 to -33.09 |
| kidney       | PBS(Fix-poly) vs CM(Fix-poly)    | -41.88     | 26.55  | ***     | -49.22 to -34.54 |
|              | PBS(Fix-poly) vs SDS(ETC)        | -58.06     | 36.8   | ***     | -65.40 to -50.72 |
|              | PBS(Fix-poly) vs PBS(ETC)        | -20.79     | 13.18  | ***     | -28.13 to -13.45 |
|              | PBS(Fix-poly) vs CM(ETC)         | -59.55     | 37.75  | ***     | -66.89 to -52.21 |
|              | CM(Fix-poly) vs SDS(ETC)         | -16.18     | 10.26  | ***     | -23.52 to -8.838 |
|              | CM(Fix-poly) vs PBS(ETC)         | 21.09      | 13.37  | ***     | 13.75 to 28.43   |
|              | CM(Fix-poly) vs CM(ETC)          | -17.67     | 11.2   | ***     | -25.01 to -10.33 |
|              | SDS(ETC) vs PBS(ETC)             | 37.27      | 23.62  | ***     | 29.93 to 44.61   |
|              | SDS(ETC) vs CM(ETC)              | -1.49      | 0.9445 | ns      | -8.832 to 5.852  |
|              | PBS(ETC) vs CM(ETC)              | -38.76     | 24.57  | ***     | -46.10 to -31.42 |
| lung         | PBS(Fix-poly) vs CM(Fix-poly)    | -40.69     | 16.49  | ***     | -52.17 to -29.21 |
|              | PBS(Fix-poly) vs SDS(ETC)        | -31.26     | 12.67  | ***     | -42.74 to -19.78 |
|              | PBS(Fix-poly) vs PBS(ETC)        | -16.14     | 6.542  | **      | -27.62 to -4.658 |
|              | PBS(Fix-poly) vs CM(ETC)         | -47        | 19.05  | ***     | -58.48 to -35.52 |

|             |                               |        |        |     |                  |
|-------------|-------------------------------|--------|--------|-----|------------------|
|             | CM(Fix-poly) vs SDS(ETC)      | 9.43   | 3.822  | ns  | -2.052 to 20.91  |
|             | CM(Fix-poly) vs PBS(ETC)      | 24.55  | 9.951  | *** | 13.07 to 36.03   |
|             | CM(Fix-poly) vs CM(ETC)       | -6.31  | 2.558  | ns  | -17.79 to 5.172  |
|             | SDS(ETC) vs PBS(ETC)          | 15.12  | 6.129  | *   | 3.638 to 26.60   |
|             | SDS(ETC) vs CM(ETC)           | -15.74 | 6.38   | **  | -27.22 to -4.258 |
|             | PBS(ETC) vs CM(ETC)           | -30.86 | 12.51  | *** | -42.34 to -19.38 |
| <b>Size</b> |                               |        |        |     |                  |
|             | PBS(Fix-poly) vs CM(Fix-poly) | 35.33  | 4.984  | *   | 2.341 to 68.32   |
| Brain       | PBS(Fix-poly) vs SDS(ETC)     | -93.72 | 13.22  | *** | -126.7 to -60.73 |
|             | PBS(Fix-poly) vs PBS(ETC)     | -34.82 | 4.912  | *   | -67.81 to -1.831 |
|             | PBS(Fix-poly) vs CM(ETC)      | 7.66   | 1.081  | ns  | -25.33 to 40.65  |
|             | CM(Fix-poly) vs SDS(ETC)      | -129.1 | 18.21  | *** | -162.0 to -96.06 |
|             | CM(Fix-poly) vs PBS(ETC)      | -70.15 | 9.897  | *** | -103.1 to -37.16 |
|             | CM(Fix-poly) vs CM(ETC)       | -27.67 | 3.904  | ns  | -60.66 to 5.319  |
|             | SDS(ETC) vs PBS(ETC)          | 58.9   | 8.31   | **  | 25.91 to 91.89   |
|             | SDS(ETC) vs CM(ETC)           | 101.4  | 14.3   | *** | 68.39 to 134.4   |
|             | PBS(ETC) vs CM(ETC)           | 42.48  | 5.993  | *   | 9.491 to 75.47   |
|             | PBS(Fix-poly) vs CM(Fix-poly) | -20.75 | 9.202  | *** | -31.24 to -10.26 |
| liver       | PBS(Fix-poly) vs SDS(ETC)     | -143.6 | 63.67  | *** | -154.1 to -133.1 |
|             | PBS(Fix-poly) vs PBS(ETC)     | -130.2 | 57.76  | *** | -140.7 to -119.8 |
|             | PBS(Fix-poly) vs CM(ETC)      | -42.15 | 18.69  | *** | -52.64 to -31.66 |
|             | CM(Fix-poly) vs SDS(ETC)      | -122.8 | 54.47  | *** | -133.3 to -112.3 |
|             | CM(Fix-poly) vs PBS(ETC)      | -109.5 | 48.56  | *** | -120.0 to -99.00 |
|             | CM(Fix-poly) vs CM(ETC)       | -21.4  | 9.491  | *** | -31.90 to -10.91 |
|             | SDS(ETC) vs PBS(ETC)          | 13.32  | 5.909  | *   | 2.830 to 23.82   |
|             | SDS(ETC) vs CM(ETC)           | 101.4  | 44.98  | *** | 90.93 to 111.9   |
|             | PBS(ETC) vs CM(ETC)           | 88.1   | 39.07  | *** | 77.60 to 98.59   |
|             | PBS(Fix-poly) vs CM(Fix-poly) | -1.849 | 0.7198 | ns  | -13.81 to 10.11  |
| kidney      | PBS(Fix-poly) vs SDS(ETC)     | -49.39 | 19.22  | *** | -61.35 to -37.43 |
|             | PBS(Fix-poly) vs PBS(ETC)     | -21.02 | 8.181  | **  | -32.97 to -9.061 |
|             | PBS(Fix-poly) vs CM(ETC)      | 2.833  | 1.103  | ns  | -9.124 to 14.79  |
|             | CM(Fix-poly) vs SDS(ETC)      | -47.54 | 18.5   | *** | -59.50 to -35.58 |
|             | CM(Fix-poly) vs PBS(ETC)      | -19.17 | 7.461  | **  | -31.12 to -7.211 |
|             | CM(Fix-poly) vs CM(ETC)       | 4.682  | 1.822  | ns  | -7.275 to 16.64  |
|             | SDS(ETC) vs PBS(ETC)          | 28.37  | 11.04  | *** | 16.41 to 40.33   |
|             | SDS(ETC) vs CM(ETC)           | 52.22  | 20.33  | *** | 40.26 to 64.18   |
|             | PBS(ETC) vs CM(ETC)           | 23.85  | 9.283  | *** | 11.89 to 35.81   |
|             | PBS(Fix-poly) vs CM(Fix-poly) | -19.48 | 7.097  | **  | -32.26 to -6.705 |
| lung        | PBS(Fix-poly) vs SDS(ETC)     | -4.533 | 1.651  | ns  | -17.31 to 8.243  |
|             | PBS(Fix-poly) vs PBS(ETC)     | 27.32  | 9.951  | *** | 14.54 to 40.09   |

|                          |        |       |     |                 |
|--------------------------|--------|-------|-----|-----------------|
| PBS(Fix-poly) vs CM(ETC) | 15.84  | 5.77  | *   | 3.063 to 28.61  |
| CM(Fix-poly) vs SDS(ETC) | 14.95  | 5.445 | *   | 2.172 to 27.72  |
| CM(Fix-poly) vs PBS(ETC) | 46.8   | 17.05 | *** | 34.02 to 59.57  |
| CM(Fix-poly) vs CM(ETC)  | 35.32  | 12.87 | *** | 22.54 to 48.09  |
| SDS(ETC) vs PBS(ETC)     | 31.85  | 11.6  | *** | 19.07 to 44.62  |
| SDS(ETC) vs CM(ETC)      | 20.37  | 7.421 | **  | 7.596 to 33.15  |
| PBS(ETC) vs CM(ETC)      | -11.48 | 4.181 | ns  | -24.25 to 1.298 |
| PBS(ETC) vs CM(ETC)      | -11.48 | 4.181 | ns  | -24.25 to 1.298 |
